# Supplementary material for: Assessment of Studies Evaluating Spinal Manipulative Therapy and Infectious Disease and Immune System Outcomes: A Systematic Review
Source: PubMed Central journal article supplement (PMC8044731; doi:10.1001/jamanetworkopen.2021.5493), 2021-04-13
Supplement: jamanetwopen-e215493-s001.pdf [file jamanetwopen-e215493-s001.pdf]

## Supplementary Online Content

Chow N, Hogg-Johnson S, Mior S, et al. Assessment of studies evaluating spinal manipulative therapy and infectious disease and immune system outcomes: a systematic review. *JAMA Netw Open*. 2021;4(4):e215493. doi:10.1001/jamanetworkopen.2021.5493

**eMethods 1.** Protocol and Registration, Eligibility Criteria, Information Sources, Study Selection, Risk of Bias in Individual Studies, Data Extraction, Data Items, Statistical Analysis, and Evidence Synthesis

**eMethods 2.** Search Strategies

**eTable 1.** Evidence Table for Immune Markers

**eTable 2.** Evidence Table for Endocrine and Other Physiological Markers

**eReferences**

This supplementary material has been provided by the authors to give readers additional information about their work.

## **eMethods 1. Protocol and Registration, Eligibility Criteria, Information Sources, Study Selection, Risk of Bias in Individual Studies, Data Extraction, Data Items, Statistical Analysis, and Evidence Synthesis**

We conducted a systematic review of the literature. Rapid reviews are used by health decision-makers (clinicians, patients, managers, and policy makers) who need timely access to health information to plan, develop and implement health care and policies.<sup>9-12</sup> We used methodology recommended by the World Health Organization, previously used by our group,<sup>13,14</sup> to answer our questions.

### **Protocol and Registration**

We reported our review according to the Preferred Reporting Items for Systematic Reviews and Meta-Analysis (PRISMA) checklist.<sup>15</sup> The review protocol was submitted to the Open Science Framework Registry on April 21, 2020 (<https://osf.io/ux7wc>).

### **Eligibility Criteria**

#### *Participants*

We included studies of healthy and symptomatic participants.

#### *Interventions*

SMT includes spinal manipulation and spinal mobilization provided by any type of provider. Spinal manipulation includes techniques incorporating a high-velocity, low amplitude impulse or thrust (HVLA) applied at or near the end of a joint's passive range of motion.<sup>16</sup> Spinal mobilization includes techniques incorporating low-velocity and varying amplitude oscillatory movements within a joint's passive range of motion.<sup>16-18</sup> Spinal manipulation and mobilization involve manual, mechanically- or instrument-assisted procedures.

#### *Comparators*

We considered placebo, sham therapies, wait listing, usual care, no interventions, medication and other therapies.

#### *Outcomes*

We investigated clinical outcomes and changes in levels of immunological, endocrine and other physiological biomarkers. Clinical outcomes included incidence of infection or infectious disease, or changes in their disease-specific outcomes (e.g. number and severity of symptoms or faster recovery from illness). A biomarker is a "characteristic that is objectively measured and evaluated as an indicator of normal biological processes, pathogenic processes, or pharmacologic responses to a therapeutic intervention."<sup>19</sup> Biomarkers encompass a multitude of physiological indicators including molecules in the immune system such as cytokines, and chemokines, as well as endocrine biomarkers such as cortisol, testosterone, catecholamines and others.

#### *Study Designs*

Eligible study designs were randomized controlled trials (RCTs) and cohort studies. All other study designs were excluded.

### **Information Sources**

The search strategy was developed in consultation with a health sciences librarian, and a second librarian reviewed the strategy to ensure accuracy. We systematically searched five databases that index the manual therapy literature published by researchers from various health professions from inception to April 15, 2020: MEDLINE (U.S. National Library of Medicine, through Ovid Technologies Inc.), Cumulative Index to Nursing and Allied Health Literature (CINAHL, through EBSCOhost), Index to Chiropractic Literature (ICL, Chiropractic Library Collaboration), Cochrane Central Register of Controlled Trial and Embase (both through Ovid Technologies Inc). Search terms consisted of subject headings specific to each database (e.g. MeSH in MEDLINE) and free text words relevant to our objectives and study design (see Appendix 1). We restricted our search to papers published in English in peer-reviewed journals.

### **Study Selection**

A two-phase screening process was used to identify eligible studies. In phase one screening, we reviewed titles and abstracts and classified articles as possibly relevant or irrelevant. During phase two screening, the full text of possibly relevant articles was reviewed for final determination of eligibility. A trained reviewer (NC) conducted all of the

screenings. Prior to phase one screening, the quality of screening by NC was established by randomly selecting ten percent of all eligible articles, which were screened independently by a second experienced reviewer (SM). A 95% level of agreement was required between the two reviewers before moving to full screening. Once the 95% agreement was achieved, one reviewer (NC) completed phase one screening. For phase two screening, all potentially eligible articles were screened by rotating pairs of experienced reviewers (PC, CC, SM, JDC, SI, JTI).

### **Risk of Bias in Individual Studies**

The lead author (NC) critically appraised the internal validity of relevant articles using the Scottish Intercollegiate Guidelines Network (SIGN) criteria for RCTs and cohort studies.<sup>20</sup> A quality control step in the critical appraisal of studies was included, wherein the investigator assessing the risk of bias (NC) presented a summary of the critical appraisals to seven experienced reviewers (PC, SHJ, CC, SM, JDC, SI, JTI) who validated the outcome of the appraisals. Disagreements regarding the internal validity of papers were resolved through discussion. The lead author created risk of bias tables for all eligible studies, which was validated by the other reviewers (PC, SHJ, CC, SM, JDC, SI, JTI).

### **Data Extraction**

The lead author (NC) extracted data from high and acceptable quality (low risk of bias) studies and built evidence tables stratified by study objective and nature of the outcome. Data extraction was validated by the other reviewers (PC, SHJ, CC, SM, JDC, SI, JTI). We contacted the study authors when clarification or additional information was necessary to populate the evidence tables. Evidence tables summarized the pertinent information and were used to create summary statements describing the state of the evidence.

### **Data Items**

Information extracted from each study included study characteristics, (e.g. author, year and country of publication, study design, sample size, length of follow up), participant characteristics (e.g., age, and body region treated), intervention characteristics (e.g., description of interventions and comparison groups), and outcome data (e.g., incidence of infection or infectious disease, disease-specific outcomes, changes in the levels of immunological, endocrine and other physiological biomarkers).

### *Classification of Clinical Trial Phases*

We categorized RCTs into the different phases of clinical trials as described by Campbell et al.<sup>21</sup> The purpose of a phase 0 (exploratory) study is to gather preliminary data on whether the intervention behaves as expected in humans based on preclinical studies, and involves limited human exposure (10-15 healthy volunteers) to the intervention, with no therapeutic or diagnostic goals.<sup>21</sup> A phase 1 (safety) study aims to determine safety of the intervention and typically involves 20-80 healthy volunteers.<sup>21</sup> A phase 2 (biologic activity) study aims to establish proof of concept that the intervention has biologic activity, usually involving 100-300 patients with specific diseases.<sup>21</sup> A phase 3 (efficacy) study aims to confirm the efficacy and effectiveness of the intervention, monitor side effects, and frequently involves 300-3000 patients with specific diseases.<sup>21</sup> A phase 4 (post-marketing/confirmatory) study aims to provide surveillance and additional information on the intervention's risks, benefits and best use after the intervention is approved for human use, and involves several thousand patients treated with the intervention.<sup>21</sup>

### **Statistical Analysis**

We reported or computed (when data were available), the incidence and 95% confidence intervals (CI) of infection or infectious disease, and mean difference and 95% CI in change in the level of biomarkers. We reported or calculated the pre-post difference in means or mean differences between groups based on data derived from regression models. Incidence was measured by calculating the number of new cases of infection or infectious disease in a group divided by the total number of participants in the same group. Confidence intervals were calculated using incidence of infection or infectious disease in each group, total number of participants in each group, and  $\alpha = 0.05$ .

### **Evidence Synthesis**

We synthesized the evidence from high and acceptable quality studies according to the Synthesis without Meta-Analysis (SWiM) Guideline,<sup>22</sup> study objective, and type of biomarker. We restricted our synthesis to studies with high or acceptable quality because low/unacceptable quality studies are more likely to yield biased estimates of effect sizes.<sup>23-27</sup>

## eMethods 2. Search Strategies

CCBC\_RR3\_Immunesystem\_MEDLINE

Search run April 16, 2020 in Ovid MEDLINE: Epub Ahead of Print, In-Process & Other Non-Indexed Citations, Ovid MEDLINE® Daily and Ovid MEDLINE® 1946-Present; 634 results

|    |                                                                                                                                                                                                    |        |
|----|----------------------------------------------------------------------------------------------------------------------------------------------------------------------------------------------------|--------|
| 1  | Musculoskeletal Manipulations/                                                                                                                                                                     | 1732   |
| 2  | Manipulation, Spinal/                                                                                                                                                                              | 1568   |
| 3  | Manipulation, Chiropractic/                                                                                                                                                                        | 985    |
| 4  | Manipulation, Orthopedic/                                                                                                                                                                          | 3891   |
| 5  | Manipulation, Osteopathic/                                                                                                                                                                         | 1007   |
| 6  | (Activator adj (method or tool*)).ab,ti.                                                                                                                                                           | 7      |
| 7  | (adjust* adj3 (chiropract* or spinal or lumbar or cervical or thoracic or instrument* or tool* or electric)).ab,ti.                                                                                | 1750   |
| 8  | (flexion-distraction or flexion distraction).ab,ti.                                                                                                                                                | 257    |
| 9  | (HVLA or high velocity low amplitude).ab,ti.                                                                                                                                                       | 268    |
| 10 | (manipulat* adj3 (chiropract* or naprapath* or osteopath* or orthopedic* or orthopaedic*)).ab,ti.                                                                                                  | 1502   |
| 11 | (manipulat* adj3 (spinal or spine or low* back or joint* or lumbar or neck or therap* or thoracic or cervical or intervention* or MSK or manage* or musculoskeletal or treat* or vertebr*)).ab,ti. | 9359   |
| 12 | (instrument* adj3 (manual or mobili?at* or manipulat*)).ab,ti.                                                                                                                                     | 1111   |
| 13 | (manipulat* adj3 (physiotherap* or physical therap*)).ab,ti.                                                                                                                                       | 264    |
| 14 | (mobili?at* adj3 (chiropract* or naprapath* or osteopath* or orthopedic* or orthopaedic*)).ab,ti.                                                                                                  | 29     |
| 15 | (mobili?at* adj3 (spinal or spine or low* back or joint* or lumbar or neck or thoracic or cervical or MSK or musculoskeletal or vertebr* or therap* or treat* or intervention* or manage*)).ab,ti. | 2720   |
| 16 | ((manipulat* or mobili?at*) adj4 instrument*).ab,ti.                                                                                                                                               | 767    |
| 17 | (manual adj3 (therap* or treat* or intervention* or manag*)).ab,ti.                                                                                                                                | 5252   |
| 18 | or/1-17 [**intervention]                                                                                                                                                                           | 25062  |
| 19 | Case-Control Studies/                                                                                                                                                                              | 281252 |
| 20 | Clinical Trials as Topic/                                                                                                                                                                          | 190776 |
| 21 | clinical trial.pt.                                                                                                                                                                                 | 522192 |
| 22 | Cohort Studies/                                                                                                                                                                                    | 259025 |
| 23 | controlled clinical trial.pt.                                                                                                                                                                      | 93621  |
| 24 | Controlled Clinical Trials as Topic/                                                                                                                                                               | 5500   |
| 25 | Cross-Over Studies/                                                                                                                                                                                | 47515  |
| 26 | Double Blind Method/                                                                                                                                                                               | 157136 |
| 27 | Epidemiologic Studies/                                                                                                                                                                             | 8272   |
| 28 | Follow-Up Studies/                                                                                                                                                                                 | 638093 |
| 29 | Longitudinal Studies/                                                                                                                                                                              | 132993 |
| 30 | Observational Study.pt.                                                                                                                                                                            | 77739  |
| 31 | Prospective Studies/                                                                                                                                                                               | 534985 |
| 32 | Random Allocation/                                                                                                                                                                                 | 102602 |
| 33 | randomized controlled trial.pt.                                                                                                                                                                    | 503984 |

|    |                                                                                                      |         |
|----|------------------------------------------------------------------------------------------------------|---------|
| 34 | exp Randomized Controlled Trial/                                                                     | 504766  |
| 35 | Randomized Controlled Trials as Topic/                                                               | 132074  |
| 36 | Retrospective Studies/                                                                               | 811803  |
| 37 | Single Blind Method/                                                                                 | 28369   |
| 38 | ((crossover or cross-over) adj3 (study or studies or trial*)).ab,ti.                                 | 44437   |
| 39 | ((followup or follow-up) adj3 (stud* or design* or analysis)).ab,kf,ti.                              | 80973   |
| 40 | "cohort*" .ab,ti.                                                                                    | 574314  |
| 41 | (control* adj3 (group* or trial*)).ab,ti.                                                            | 765649  |
| 42 | (longitudinal* adj3 (stud* or design* or analysis)).ab,ti.                                           | 116244  |
| 43 | (observational adj3 (stud* or design* or analysis)).ab,ti.                                           | 141167  |
| 44 | (prospective adj3 (stud* or design* or analysis)).ab,ti.                                             | 376632  |
| 45 | (random* adj5 (allocat* or assign* or control* or clinical or patient* or sample* or trial*)).ab,ti. | 657292  |
| 46 | (retrospective adj3 (stud* or design*)).ab,ti.                                                       | 298953  |
| 47 | ((singl* or doubl* or treb* or tripl*) adj3 (blind* or mask*)).ab,ti.                                | 172585  |
| 48 | or/19-47 [**study designs]                                                                           | 4133448 |
| 49 | "Allergy and Immunology"/                                                                            | 6771    |
| 50 | Anti-Allergic Agents/                                                                                | 8013    |
| 51 | exp Antibodies/                                                                                      | 814756  |
| 52 | Biomarkers/                                                                                          | 271257  |
| 53 | exp CD4 Lymphocyte Count/                                                                            | 25969   |
| 54 | exp Chemokines, CC/                                                                                  | 24003   |
| 55 | exp Communicable Diseases/                                                                           | 35019   |
| 56 | Cytokines/                                                                                           | 145261  |
| 57 | exp Endocrine System/                                                                                | 442746  |
| 58 | exp Immune System/                                                                                   | 1141233 |
| 59 | exp Immunity/                                                                                        | 336653  |
| 60 | exp Immunoglobulins/                                                                                 | 879375  |
| 61 | exp Infections/                                                                                      | 2568934 |
| 62 | Inflammation/                                                                                        | 154033  |
| 63 | Inflammation Mediators/                                                                              | 32052   |
| 64 | exp Interleukin-1/                                                                                   | 58422   |
| 65 | Luminescent Measurements/                                                                            | 27802   |
| 66 | Monocytes/                                                                                           | 57030   |
| 67 | Neutrophils/                                                                                         | 86212   |
| 68 | Radioimmunoassay/                                                                                    | 64573   |
| 69 | Respiratory Burst/                                                                                   | 5093    |
| 70 | exp Selectins/                                                                                       | 14574   |
| 71 | Th1 Cells/                                                                                           | 17943   |
| 72 | Th2 Cells/                                                                                           | 16723   |

|     |                                                     |         |
|-----|-----------------------------------------------------|---------|
| 73  | exp Tumor Necrosis Factors/                         | 151654  |
| 74  | exp Viruses/                                        | 770978  |
| 75  | allergy.ab,ti.                                      | 64878   |
| 76  | (anti-allerg* or antiallerg*).ab,ti.                | 5310    |
| 77  | "antibod*".ab,ti.                                   | 842302  |
| 78  | biomarker*.ab,ti.                                   | 249353  |
| 79  | CD4.ab,ti.                                          | 149616  |
| 80  | "chemokine*".ab,ti.                                 | 67844   |
| 81  | "cytokine*".ab,ti.                                  | 354029  |
| 82  | (disease* adj4 (communicable or infectious)).ab,ti. | 99375   |
| 83  | endocrine.ab,ti.                                    | 120124  |
| 84  | (immune or immunity).ab,ti.                         | 711778  |
| 85  | "immunoglobulin*".ab,ti.                            | 152245  |
| 86  | immunology.ab,ti.                                   | 22543   |
| 87  | "infection*".ab,ti.                                 | 1357011 |
| 88  | "inflammation*".ab,ti.                              | 420522  |
| 89  | (Interleukin-1 or Interleukin-2).ab,ti.             | 63128   |
| 90  | "luminescent measurement*".ab,ti.                   | 27      |
| 91  | monocytes.ab,ti.                                    | 69780   |
| 92  | neutrophils.ab,ti.                                  | 78121   |
| 93  | radioimmunoassay.ab,ti.                             | 49274   |
| 94  | respiratory burst.ab,ti.                            | 5826    |
| 95  | selectins.ab,ti.                                    | 2081    |
| 96  | substance P.ab,ti.                                  | 22186   |
| 97  | (Th1 or Th2).ab,ti.                                 | 52229   |
| 98  | (TNFalpha or TNF-alpha).ab,ti.                      | 149691  |
| 99  | Tumor Necrosis Factor-alpha.ab,ti.                  | 76702   |
| 100 | or/49-99 [**immune_system]                          | 6624939 |
| 101 | 18 and 48 and 100                                   | 719     |
| 102 | limit 101 to english language                       | 634     |

### Index to Chiropractic Literature

Search run April 16, 2020. Truncated text words for all MEDLINE search lines searched, as well as known authors. Case reports and conference abstracts removed. 30 articles downloaded.

| Description        | Articles                                                                                                                                                                                                                                         | Date                           |
|--------------------|--------------------------------------------------------------------------------------------------------------------------------------------------------------------------------------------------------------------------------------------------|--------------------------------|
| <a href="#">S1</a> | All Fields:manipulat* OR All Fields:activator OR All Fields:adjustment* OR All Fields:flexion OR All Fields:HVLA OR All Fields:instrument* OR All Fields>manual, Peer Review only                                                                | 3799<br>2020-04-16<br>15:15:35 |
| <a href="#">S2</a> | All Fields:allergy OR All Fields:antibod* OR All Fields:biomarker* OR All Fields:CD4 OR All Fields:Chemokine* OR Subject:"Communicable Diseases\" OR All Fields:cytokine* OR All Fields:endocrine OR All Fields:immune OR All Fields:immunity OR | 28<br>2020-04-16<br>15:19:44   |

|                    |                                                                                                                                                                                                                                                                                                                                                                                                                                                                                                                                                                                                                                                                                                                                                                                                                                                                                                                                                                             |     |                        |
|--------------------|-----------------------------------------------------------------------------------------------------------------------------------------------------------------------------------------------------------------------------------------------------------------------------------------------------------------------------------------------------------------------------------------------------------------------------------------------------------------------------------------------------------------------------------------------------------------------------------------------------------------------------------------------------------------------------------------------------------------------------------------------------------------------------------------------------------------------------------------------------------------------------------------------------------------------------------------------------------------------------|-----|------------------------|
|                    | All Fields:Immunoglobulin* OR All Fields:Interleukin OR All Fields:Monocyte* OR All Fields:TH2 AND All Fields:infection* OR All Fields:infectious, Peer Review only                                                                                                                                                                                                                                                                                                                                                                                                                                                                                                                                                                                                                                                                                                                                                                                                         |     |                        |
| <a href="#">S3</a> | All Fields:manipulat* OR All Fields:activator OR All Fields:adjustment* OR All Fields:flexion OR All Fields:HVLA OR All Fields:instrument* OR All Fields>manual, Peer Review only AND All Fields:allergy OR All Fields:antibod* OR All Fields:biomarker* OR All Fields:CD4 OR All Fields:Chemokine* OR Subject:"Communicable Diseases\" OR All Fields:cytokine* OR All Fields:endocrine OR All Fields:immune OR All Fields:immunity OR All Fields:Immunoglobulin* OR All Fields:Interleukin OR All Fields:Monocyte* OR All Fields:TH2 AND All Fields:infection* OR All Fields:infectious, Peer Review only                                                                                                                                                                                                                                                                                                                                                                  | 10  | 2020-04-16<br>15:20:12 |
| <a href="#">S4</a> | All Fields:immune OR All Fields:autoimmune OR All Fields:neuroimmune OR All Fields:immun* OR Author:"Injeyan HS\" OR Author:"Teodorczyk-Injeyan JA\"", Peer Review only                                                                                                                                                                                                                                                                                                                                                                                                                                                                                                                                                                                                                                                                                                                                                                                                     | 148 | 2020-04-16<br>15:24:57 |
| <a href="#">S5</a> | All Fields:manipulat* OR All Fields:activator OR All Fields:adjustment* OR All Fields:flexion OR All Fields:HVLA OR All Fields:instrument* OR All Fields>manual, Peer Review only AND All Fields:allergy OR All Fields:antibod* OR All Fields:biomarker* OR All Fields:CD4 OR All Fields:Chemokine* OR Subject:"Communicable Diseases\" OR All Fields:cytokine* OR All Fields:endocrine OR All Fields:immune OR All Fields:immunity OR All Fields:Immunoglobulin* OR All Fields:Interleukin OR All Fields:Monocyte* OR All Fields:TH2 AND All Fields:infection* OR All Fields:infectious, Peer Review only OR All Fields:immune OR All Fields:autoimmune OR All Fields:neuroimmune OR All Fields:immun* OR Author:"Injeyan HS\" OR Author:"Teodorczyk-Injeyan JA\"", Peer Review only                                                                                                                                                                                       | 152 | 2020-04-16<br>15:25:14 |
| <a href="#">S6</a> | All Fields:manipulat* OR All Fields:activator OR All Fields:adjustment* OR All Fields:flexion OR All Fields:HVLA OR All Fields:instrument* OR All Fields>manual, Peer Review only AND All Fields:manipulat* OR All Fields:activator OR All Fields:adjustment* OR All Fields:flexion OR All Fields:HVLA OR All Fields:instrument* OR All Fields>manual, Peer Review only AND All Fields:allergy OR All Fields:antibod* OR All Fields:biomarker* OR All Fields:CD4 OR All Fields:Chemokine* OR Subject:"Communicable Diseases\" OR All Fields:cytokine* OR All Fields:endocrine OR All Fields:immune OR All Fields:immunity OR All Fields:Immunoglobulin* OR All Fields:Interleukin OR All Fields:Monocyte* OR All Fields:TH2 AND All Fields:infection* OR All Fields:infectious, Peer Review only OR All Fields:immune OR All Fields:autoimmune OR All Fields:neuroimmune OR All Fields:immun* OR Author:"Injeyan HS\" OR Author:"Teodorczyk-Injeyan JA\"", Peer Review only | 55  | 2020-04-16<br>15:25:27 |
| <a href="#">S7</a> | Author:"Campbell CJ\""                                                                                                                                                                                                                                                                                                                                                                                                                                                                                                                                                                                                                                                                                                                                                                                                                                                                                                                                                      | 1   | 2020-04-16<br>15:30:43 |
| <a href="#">S8</a> | Author:"Pero RW\""                                                                                                                                                                                                                                                                                                                                                                                                                                                                                                                                                                                                                                                                                                                                                                                                                                                                                                                                                          | 1   | 2020-04-16<br>15:31:08 |
| <a href="#">S9</a> | Author:"Selano J\" OR Author:"Selano JL\"", Peer Review only                                                                                                                                                                                                                                                                                                                                                                                                                                                                                                                                                                                                                                                                                                                                                                                                                                                                                                                | 1   | 2020-04-16<br>15:32:03 |

## Embase

## CCBC\_RR3\_Immunsystem\_Embase

Search run April 16, 2020 in Embase Classic+Embase 1947 to 2020 April 16: 1259 results

|    |                                                                                                                                                                                                    |         |
|----|----------------------------------------------------------------------------------------------------------------------------------------------------------------------------------------------------|---------|
| 1  | musculoskeletal manipulation/                                                                                                                                                                      | 306     |
| 2  | spine manipulation/                                                                                                                                                                                | 542     |
| 3  | chiropractic manipulation/                                                                                                                                                                         | 234     |
| 4  | orthopedic manipulation/                                                                                                                                                                           | 2363    |
| 5  | osteopathic manipulation/                                                                                                                                                                          | 301     |
| 6  | manipulative medicine/                                                                                                                                                                             | 10934   |
| 7  | (Activator adj (method or tool*)).ab,ti.                                                                                                                                                           | 58      |
| 8  | (adjust* adj3 (chiropract* or spinal or lumbar or cervical or thoracic or instrument* or tool* or electric)).ab,ti.                                                                                | 2300    |
| 9  | (flexion-distraction or flexion distraction).ab,ti.                                                                                                                                                | 285     |
| 10 | (HVLA or high velocity low amplitude).ab,ti.                                                                                                                                                       | 279     |
| 11 | (manipulat* adj3 (chiropract* or naprapath* or osteopath* or orthopedic* or orthopaedic*)).ab,ti.                                                                                                  | 1896    |
| 12 | (manipulat* adj3 (spinal or spine or low* back or joint* or lumbar or neck or therap* or thoracic or cervical or intervention* or MSK or manage* or musculoskeletal or treat* or vertebr*)).ab,ti. | 12195   |
| 13 | (instrument* adj3 (manual or mobili?at* or manipulat*)).ab,ti.                                                                                                                                     | 1514    |
| 14 | (manipulat* adj3 (physiotherap* or physical therap*)).ab,ti.                                                                                                                                       | 349     |
| 15 | (mobili?at* adj3 (chiropract* or naprapath* or osteopath* or orthopedic* or orthopaedic*)).ab,ti.                                                                                                  | 38      |
| 16 | (mobili?at* adj3 (spinal or spine or low* back or joint* or lumbar or neck or thoracic or cervical or MSK or musculoskeletal or vertebr* or therap* or treat* or intervention* or manage*)).ab,ti. | 4032    |
| 17 | (manual adj3 (therap* or treat* or intervention* or manag*)).ab,ti.                                                                                                                                | 7786    |
| 18 | ((therap* or treat* or intervention* or manag*) adj3 (manual or manipulat* or mobili?at* or MSK or musculoskeletal)).ab,ti.                                                                        | 23385   |
| 19 | or/1-18 [** spinal_manipulation]                                                                                                                                                                   | 39737   |
| 20 | case control study/                                                                                                                                                                                | 154150  |
| 21 | "clinical trial (topic)"/                                                                                                                                                                          | 107102  |
| 22 | clinical trial/                                                                                                                                                                                    | 993257  |
| 23 | cohort analysis/                                                                                                                                                                                   | 567069  |
| 24 | "controlled clinical trial (topic)"/                                                                                                                                                               | 10675   |
| 25 | controlled study/                                                                                                                                                                                  | 7355449 |
| 26 | controlled clinical trial/                                                                                                                                                                         | 464348  |
| 27 | double blind procedure/                                                                                                                                                                            | 173984  |
| 28 | follow up/                                                                                                                                                                                         | 1566467 |
| 29 | longitudinal study/                                                                                                                                                                                | 138855  |
| 30 | observational study/                                                                                                                                                                               | 193758  |
| 31 | prospective study/                                                                                                                                                                                 | 595453  |
| 32 | random sample/                                                                                                                                                                                     | 12945   |



|    |                                                                                                      |          |
|----|------------------------------------------------------------------------------------------------------|----------|
| 33 | randomized controlled trial/                                                                         | 601440   |
| 34 | "randomized controlled trial (topic)"/                                                               | 177191   |
| 35 | retrospective study/                                                                                 | 906072   |
| 36 | single blind procedure/                                                                              | 38585    |
| 37 | ((crossover or cross-over) adj3 (study or studies or trial*)).ab,ti.                                 | 58815    |
| 38 | [((followup or follow-up) adj3 (stud* or design* or analysis)).ab,kf,ti.]                            | 0        |
| 39 | "cohort*" .ab,ti.                                                                                    | 976377   |
| 40 | (control* adj3 (group* or trial*)).ab,ti.                                                            | 1092420  |
| 41 | (longitudinal* adj3 (stud* or design* or analysis)).ab,ti.                                           | 155879   |
| 42 | (observational adj3 (stud* or design* or analysis)).ab,ti.                                           | 222054   |
| 43 | (prospective adj3 (stud* or design* or analysis)).ab,ti.                                             | 558139   |
| 44 | (random* adj5 (allocat* or assign* or control* or clinical or patient* or sample* or trial*)).ab,ti. | 916947   |
| 45 | (retrospective adj3 (stud* or design*)).ab,ti.                                                       | 468052   |
| 46 | ((singl* or doubl* or treb* or tripl*) adj3 (blind* or mask*)).ab,ti.                                | 244444   |
| 47 | or/20-46 [**study designs]                                                                           | 11009994 |
| 48 | allergy/                                                                                             | 81119    |
| 49 | antibody/                                                                                            | 240916   |
| 50 | CD4 antigen/                                                                                         | 122632   |
| 51 | exp chemokine/                                                                                       | 215047   |
| 52 | exp communicable disease/                                                                            | 29048    |
| 53 | cytokine/                                                                                            | 239842   |
| 54 | endocrine system/                                                                                    | 180095   |
| 55 | exp immune system/                                                                                   | 2264983  |
| 56 | exp immunity/                                                                                        | 1566062  |
| 57 | exp immunoglobulin/                                                                                  | 525460   |
| 58 | infection/                                                                                           | 395080   |
| 59 | inflammation/                                                                                        | 458324   |
| 60 | autacoid/                                                                                            | 6326     |
| 61 | interleukin 1/                                                                                       | 63814    |
| 62 | luminescence/                                                                                        | 27684    |
| 63 | monocyte/                                                                                            | 115087   |
| 64 | neutrophil/                                                                                          | 143602   |
| 65 | radioimmunoassay/                                                                                    | 85142    |
| 66 | respiratory burst/                                                                                   | 9581     |
| 67 | "selectin (glycoprotein)"/                                                                           | 181      |
| 68 | Th1 cell/                                                                                            | 37631    |
| 69 | Th2 cell/                                                                                            | 33231    |
| 70 | tumor necrosis factor/                                                                               | 126974   |
| 71 | virus/                                                                                               | 86679    |

|     |                                                                                                                                                        |         |
|-----|--------------------------------------------------------------------------------------------------------------------------------------------------------|---------|
| 72  | allergy.ab,ti.                                                                                                                                         | 112329  |
| 73  | (anti-allerg* or antiallerg*).ab,ti.                                                                                                                   | 7807    |
| 74  | "antibod*" .ab,ti.                                                                                                                                     | 1129774 |
| 75  | CD4.ab,ti.                                                                                                                                             | 213717  |
| 76  | "chemokine*" .ab,ti.                                                                                                                                   | 95545   |
| 77  | "cytokine*" .ab,ti.                                                                                                                                    | 492200  |
| 78  | (disease* adj4 (communicable or infectious)).ab,ti.                                                                                                    | 144693  |
| 79  | endocrine.ab,ti.                                                                                                                                       | 183409  |
| 80  | (immune or immunity).ab,ti.                                                                                                                            | 973061  |
| 81  | "immunoglobulin*" .ab,ti.                                                                                                                              | 196408  |
| 82  | immunology.ab,ti.                                                                                                                                      | 45580   |
| 83  | "infection*" .ab,ti.                                                                                                                                   | 1845658 |
| 84  | "inflammation*" .ab,ti.                                                                                                                                | 630961  |
| 85  | (Interleukin-1 or Interleukin-2).ab,ti.                                                                                                                | 67053   |
| 86  | "luminescent measurement*" .ab,ti.                                                                                                                     | 29      |
| 87  | monocytes.ab,ti.                                                                                                                                       | 98125   |
| 88  | neutrophils.ab,ti.                                                                                                                                     | 108852  |
| 89  | radioimmunoassay.ab,ti.                                                                                                                                | 58760   |
| 90  | respiratory burst.ab,ti.                                                                                                                               | 6550    |
| 91  | selectins.ab,ti.                                                                                                                                       | 2495    |
| 92  | substance P.ab,ti.                                                                                                                                     | 25443   |
| 93  | (Th1 or Th2).ab,ti.                                                                                                                                    | 75705   |
| 94  | (TNFalpha or TNF-alpha).ab,ti.                                                                                                                         | 202440  |
| 95  | Tumor Necrosis Factor-alpha.ab,ti.                                                                                                                     | 85373   |
| 96  | or/48-95 [**immune_system]                                                                                                                             | 6783955 |
| 97  | 19 and 47 and 96                                                                                                                                       | 2291    |
| 98  | limit 97 to english language                                                                                                                           | 2199    |
| 99  | limit 98 to (books or chapter or conference abstract or conference paper or "conference review" or editorial or erratum or letter or note or "review") | 941     |
| 100 | 98 not 99                                                                                                                                              | 1259    |

CINAHL

CCBC\_RR3\_Immunosystem\_CINAHL

Search run April 15, 2020 in CINAHL Plus with Full Text; 433 results

| #   | Query                                                                                                                                       | Results |
|-----|---------------------------------------------------------------------------------------------------------------------------------------------|---------|
| S82 | S16 AND S33 AND S80<br>Limiters - English Language; Peer Reviewed<br>Expanders - Apply equivalent subjects<br>Search modes - Boolean/Phrase | 433     |
| S81 | S16 AND S33 AND S80                                                                                                                         | 490     |

|     |                                                                                                                                                                                                                                                                                                                                |         |
|-----|--------------------------------------------------------------------------------------------------------------------------------------------------------------------------------------------------------------------------------------------------------------------------------------------------------------------------------|---------|
| S80 | S34 OR S35 OR S36 OR S37 OR S38 OR S39 OR S40 OR S41 OR S42 OR S43 OR S44 OR S45 OR S46 OR S47 OR S48 OR S49 OR S50 OR S51 OR S52 OR S53 OR S54 OR S55 OR S56 OR S57 OR S58 OR S59 OR S60 OR S61 OR S62 OR S63 OR S64 OR S65 OR S66 OR S67 OR S68 OR S69 OR S70 OR S71 OR S72 OR S73 OR S74 OR S75 OR S76 OR S77 OR S78 OR S79 | 854,487 |
| S79 | Tumor Necrosis Factor-alpha                                                                                                                                                                                                                                                                                                    | 6,767   |
| S78 | TNFalpha or TNF-alpha                                                                                                                                                                                                                                                                                                          | 9,624   |
| S77 | Th1 or Th2                                                                                                                                                                                                                                                                                                                     | 2,635   |
| S76 | substance P                                                                                                                                                                                                                                                                                                                    | 140,242 |
| S75 | selectins                                                                                                                                                                                                                                                                                                                      | 1,813   |
| S74 | respiratory burst                                                                                                                                                                                                                                                                                                              | 183     |
| S73 | radioimmunoassay                                                                                                                                                                                                                                                                                                               | 3,329   |
| S72 | neutrophils                                                                                                                                                                                                                                                                                                                    | 14,833  |
| S71 | monocytes                                                                                                                                                                                                                                                                                                                      | 8,974   |
| S70 | luminescent measurement*                                                                                                                                                                                                                                                                                                       | 636     |
| S69 | Interleukin-1 or Interleukin-2                                                                                                                                                                                                                                                                                                 | 4,406   |
| S68 | inflammation*                                                                                                                                                                                                                                                                                                                  | 87,052  |
| S67 | infection*                                                                                                                                                                                                                                                                                                                     | 372,110 |
| S66 | immunology                                                                                                                                                                                                                                                                                                                     | 78,867  |
| S65 | immunoglobulin*                                                                                                                                                                                                                                                                                                                | 31,445  |
| S64 | immune or immunity                                                                                                                                                                                                                                                                                                             | 77,934  |
| S63 | endocrine                                                                                                                                                                                                                                                                                                                      | 18,176  |
| S62 | disease* N4 (communicable or infectious)                                                                                                                                                                                                                                                                                       | 32,870  |
| S61 | cytokine*                                                                                                                                                                                                                                                                                                                      | 41,368  |
| S60 | chemokine*                                                                                                                                                                                                                                                                                                                     | 6,497   |
| S59 | CD4                                                                                                                                                                                                                                                                                                                            | 16,615  |
| S58 | biomarker*                                                                                                                                                                                                                                                                                                                     | 61,248  |
| S57 | antibod*                                                                                                                                                                                                                                                                                                                       | 81,281  |
| S56 | anti-allerg* or antiallerg*                                                                                                                                                                                                                                                                                                    | 556     |
| S55 | allergy                                                                                                                                                                                                                                                                                                                        | 20,570  |
| S54 | MH Viruses                                                                                                                                                                                                                                                                                                                     | 4,986   |
| S53 | MH Tumor Necrosis Factor                                                                                                                                                                                                                                                                                                       | 19,034  |
| S52 | MH Radioimmunoassay                                                                                                                                                                                                                                                                                                            | 2,262   |

|     |                                                                                                              |           |
|-----|--------------------------------------------------------------------------------------------------------------|-----------|
| S51 | MH Neutrophils                                                                                               | 6,580     |
| S50 | MH Monocytes                                                                                                 | 3,214     |
| S49 | MH Luminescent Measurements                                                                                  | 636       |
| S48 | MH Interleukins+                                                                                             | 25,516    |
| S47 | MH Inflammation Mediators                                                                                    | 6,116     |
| S46 | MH Inflammation                                                                                              | 38,408    |
| S45 | MH Infection                                                                                                 | 16,455    |
| S44 | MH Immunoglobulins                                                                                           | 17,617    |
| S43 | MH Immunity                                                                                                  | 15,171    |
| S42 | MH Immune System                                                                                             | 9,400     |
| S41 | MH Endocrine System                                                                                          | 1,130     |
| S40 | MH Communicable Diseases+                                                                                    | 11,828    |
| S39 | MH Cytokines                                                                                                 | 21,892    |
| S38 | MH Chemokines                                                                                                | 1,843     |
| S37 | MH CD4 Lymphocyte Count                                                                                      | 6,126     |
| S36 | MH Biological Markers                                                                                        | 53,963    |
| S35 | MH Antibodies                                                                                                | 10,923    |
| S34 | MH "Allergy and Immunology"                                                                                  | 1,703     |
| S33 | S17 OR S18 OR S19 OR S20 OR S21 OR S22 OR S23 OR S24 OR S25 OR S26 OR S27 OR S28 OR S29 OR S30 OR S31 OR S32 | 1,542,090 |
| S32 | (singl* or doubl* or treb* or tripl*) N3 (blind* or mask*)                                                   | 80,244    |
| S31 | retrospective N3 (stud* or design*)                                                                          | 292,000   |
| S30 | random* N5 (allocat* or assign* or control* or clinical or patient* or sample* or trial*)                    | 373,577   |
| S29 | prospective N3 (stud* or design* or analysis)                                                                | 506,212   |
| S28 | longitudinal* N3 (stud* or design* or analysis)                                                              | 58,131    |
| S27 | control* N3 trial*                                                                                           | 211,800   |
| S26 | cohort*                                                                                                      | 220,234   |
| S25 | (followup or follow-up) N3 (stud* or design* or analysis)                                                    | 30,976    |
| S24 | (crossover or cross-over) N3 (study or studies or trial*)                                                    | 13,647    |
| S23 | case N3 (control* or series or report*)                                                                      | 253,610   |
| S22 | MH Randomized Controlled Trials                                                                              | 118,608   |
| S21 | MH Random Sample+                                                                                            | 114,961   |

|     |                                                                                                                                        |         |
|-----|----------------------------------------------------------------------------------------------------------------------------------------|---------|
| S20 | PT Clinical Trial                                                                                                                      | 110,541 |
| S19 | PT Randomized Controlled Trial                                                                                                         | 130,867 |
| S18 | (MH "Nonexperimental Studies+")                                                                                                        | 796,292 |
| S17 | MH Case-Control Studies                                                                                                                | 0       |
| S16 | S1 OR S2 OR S3 OR S4 OR S5 OR S6 OR S7 OR S8 OR S9 OR S10 OR S11 OR S12 OR S13 OR S14 OR S15                                           | 24,932  |
| S15 | (therap* or treat* or intervention* or manag*) N3 (manual or manipulat* or mobili?at* or MSK or musculoskeletal)                       | 17,015  |
| S14 | (manipulat* or mobili?at*) N4 instrument*                                                                                              | 260     |
| S13 | mobili?at* N3 (spinal or spine or low* back or joint* or lumbar or neck or thoracic or cervical or MSK or musculoskeletal or vertebr*) | 1,809   |
| S12 | mobili?at* N3 (chiropract* or naprapath* or osteopath* or orthopedic* or orthopaedic*)                                                 | 67      |
| S11 | manipulat* N3 (physiotherap* or physical therap*)                                                                                      | 275     |
| S10 | manipulat* N3 (instrument assisted or instrument-assisted)                                                                             | 19      |
| S9  | manipulat* N3 (spinal or spine or low* back or joint* or lumbar or neck or thoracic or cervical or MSK or musculoskeletal or vertebr*) | 3,155   |
| S8  | manipulat* N3 (chiropract* or naprapath* or osteopath* or orthopedic* or orthopaedic*)                                                 | 8,018   |
| S7  | HVLA or high velocity low amplitude                                                                                                    | 359     |
| S6  | flexion-distraction or flexion distraction                                                                                             | 140     |
| S5  | adjust* N3 (chiropract* or spinal or lumbar or cervical or thoracic or instrument* or tool* or electric)                               | 1,455   |
| S4  | Activator N2 (method or tool*)                                                                                                         | 107     |
| S3  | MH Manipulation, Osteopathic                                                                                                           | 768     |
| S2  | MH Manipulation, Orthopedic                                                                                                            | 2,444   |
| S1  | MH Manipulation, Chiropractic                                                                                                          | 4,370   |

**Cochrane Central**

CCBC\_RR3\_Immunosystem\_Central

Search run April 16, 2020 in EBM Reviews - Cochrane Central Register of Controlled Trials February 2020; 237 results

|   |                                             |     |
|---|---------------------------------------------|-----|
| 1 | Musculoskeletal Manipulations/              | 413 |
| 2 | Manipulation, Spinal/                       | 353 |
| 3 | Manipulation, Chiropractic/                 | 124 |
| 4 | Manipulation, Orthopedic/                   | 245 |
| 5 | Manipulation, Osteopathic/                  | 128 |
| 6 | (Activator adj (method or tool*)).ti,kw,ab. | 3   |

|    |                                                                                                                                                                                                       |        |
|----|-------------------------------------------------------------------------------------------------------------------------------------------------------------------------------------------------------|--------|
| 7  | (adjust* adj3 (chiropract* or spinal or lumbar or cervical or thoracic or instrument* or tool* or electric)).ti,kw,ab.                                                                                | 353    |
| 8  | (flexion-distraction or flexion distraction).ti,kw,ab.                                                                                                                                                | 26     |
| 9  | (HVLA or high velocity low amplitude).ti,kw,ab.                                                                                                                                                       | 192    |
| 10 | (manipulat* adj3 (chiropract* or naprapath* or osteopath* or orthopedic* or orthopaedic*)).ti,kw,ab.                                                                                                  | 605    |
| 11 | (manipulat* adj3 (spinal or spine or low* back or joint* or lumbar or neck or therap* or thoracic or cervical or intervention* or MSK or manage* or musculoskeletal or treat* or vertebr*)).ti,kw,ab. | 2734   |
| 12 | (instrument* adj3 (manual or mobili?at* or manipul*at*)).ti,kw,ab.                                                                                                                                    | 214    |
| 13 | (manipulat* adj3 (physiotherap* or physical therap*)).ti,kw,ab.                                                                                                                                       | 174    |
| 14 | (mobili?at* adj3 (chiropract* or naprapath* or osteopath* or orthopedic* or orthopaedic*)).ti,kw,ab.                                                                                                  | 33     |
| 15 | (mobili?at* adj3 (spinal or spine or low* back or joint* or lumbar or neck or thoracic or cervical or MSK or musculoskeletal or vertebr* or therap* or treat* or intervention* or manage*)).ti,kw,ab. | 1765   |
| 16 | (mobili?at* adj3 (spinal or spine or low* back or joint* or lumbar or neck or thoracic or cervical or MSK or musculoskeletal or vertebr* or therap* or treat* or intervention* or manage*)).ti,kw,ab. | 1765   |
| 17 | or/1-16 [**intervention]                                                                                                                                                                              | 5422   |
| 18 | Case-Control Studies/                                                                                                                                                                                 | 5045   |
| 19 | Clinical Trials as Topic/                                                                                                                                                                             | 33229  |
| 20 | clinical trial.pt.                                                                                                                                                                                    | 279746 |
| 21 | Cohort Studies/                                                                                                                                                                                       | 7409   |
| 22 | controlled clinical trial.pt.                                                                                                                                                                         | 91385  |
| 23 | Controlled Clinical Trials as Topic/                                                                                                                                                                  | 71     |
| 24 | Cross-Over Studies/                                                                                                                                                                                   | 36488  |
| 25 | Double Blind Method/                                                                                                                                                                                  | 135429 |
| 26 | Epidemiologic Studies/                                                                                                                                                                                | 41     |
| 27 | Follow-Up Studies/                                                                                                                                                                                    | 58629  |
| 28 | Longitudinal Studies/                                                                                                                                                                                 | 6184   |
| 29 | Observational Study.pt.                                                                                                                                                                               | 1103   |
| 30 | Prospective Studies/                                                                                                                                                                                  | 90273  |
| 31 | Random Allocation/                                                                                                                                                                                    | 20629  |
| 32 | randomized controlled trial.pt.                                                                                                                                                                       | 490034 |
| 33 | exp Randomized Controlled Trial/                                                                                                                                                                      | 131    |
| 34 | Randomized Controlled Trials as Topic/                                                                                                                                                                | 5891   |
| 35 | Retrospective Studies/                                                                                                                                                                                | 8451   |
| 36 | Single Blind Method/                                                                                                                                                                                  | 20296  |
| 37 | ((crossover or cross-over) adj3 (study or studies or trial*)).ti,kw,ab.                                                                                                                               | 67202  |
| 38 | ((followup or follow-up) adj3 (stud* or design* or analysis)).ti,kw,ab.                                                                                                                               | 40817  |

|    |                                                                                                         |         |
|----|---------------------------------------------------------------------------------------------------------|---------|
| 39 | "cohort*".ti,kw,ab.                                                                                     | 58835   |
| 40 | (longitudinal* adj3 (stud* or design* or analysis)).ti,kw,ab.                                           | 9248    |
| 41 | (observational adj3 (stud* or design* or analysis)).ti,kw,ab.                                           | 15696   |
| 42 | (prospective adj3 (stud* or design* or analysis)).ti,kw,ab.                                             | 115914  |
| 43 | (random* adj5 (allocat* or assign* or control* or clinical or patient* or sample* or trial*)).ti,kw,ab. | 844623  |
| 44 | (retrospective adj3 (stud* or design*)).ti,kw,ab.                                                       | 17848   |
| 45 | ((singl* or doubl* or treb* or tripl*) adj3 (blind* or mask*)).ti,kw,ab.                                | 294302  |
| 46 | or/18-45 [**study designs]                                                                              | 1203560 |
| 47 | "Allergy and Immunology"/                                                                               | 4       |
| 48 | exp Antibodies/                                                                                         | 19479   |
| 49 | Biomarkers/                                                                                             | 13725   |
| 50 | exp CD4 Lymphocyte Count/                                                                               | 2186    |
| 51 | exp Chemokines, CC/                                                                                     | 413     |
| 52 | exp Communicable Diseases/                                                                              | 1795    |
| 53 | Cytokines/                                                                                              | 3049    |
| 54 | exp Endocrine System/                                                                                   | 4225    |
| 55 | exp Immune System/                                                                                      | 11976   |
| 56 | exp Immunity/                                                                                           | 3151    |
| 57 | exp Immunoglobulins/                                                                                    | 20192   |
| 58 | exp Infection/                                                                                          | 23633   |
| 59 | Inflammation/                                                                                           | 5052    |
| 60 | nflammation Mediators/                                                                                  | 0       |
| 61 | exp Interleukin-1/                                                                                      | 888     |
| 62 | Luminescent Measurements/                                                                               | 168     |
| 63 | Monocytes/                                                                                              | 758     |
| 64 | Neutrophils/                                                                                            | 1380    |
| 65 | Radioimmunoassay/                                                                                       | 998     |
| 66 | Respiratory Burst/                                                                                      | 121     |
| 67 | exp Selectins/                                                                                          | 709     |
| 68 | Th1 Cells/                                                                                              | 232     |
| 69 | Th2 Cells/                                                                                              | 233     |
| 70 | exp Tumor Necrosis Factors/                                                                             | 3400    |
| 71 | exp Viruses/                                                                                            | 8960    |
| 72 | allergy.ti,kw,ab.                                                                                       | 10922   |
| 73 | (anti-allerg* or antiallerg*).ti,kw,ab.                                                                 | 688     |
| 74 | "antibod*".ti,kw,ab.                                                                                    | 34892   |
| 75 | "biomarker*".ti,kw,ab.                                                                                  | 27613   |
| 76 | CD4.ti,kw,ab.                                                                                           | 10756   |

|    |                                                        |        |
|----|--------------------------------------------------------|--------|
| 77 | "chemokine*".ti,kw,ab.                                 | 1736   |
| 78 | "cytokine*".ti,kw,ab.                                  | 16410  |
| 79 | (disease* adj4 (communicable or infectious)).ti,kw,ab. | 4301   |
| 80 | endocrine.ti,kw,ab.                                    | 10178  |
| 81 | (immune or immunity).ti,kw,ab.                         | 33846  |
| 82 | "immunoglobulin*".ti,kw,ab.                            | 8203   |
| 83 | immunology.ti,kw,ab.                                   | 2985   |
| 84 | "immunoglobulin*".ti,kw,ab.                            | 8203   |
| 85 | "infection*".ti,kw,ab.                                 | 94682  |
| 86 | "inflammation*".ti,kw,ab.                              | 35877  |
| 87 | (Interleukin-1 or Interleukin-2).ti,kw,ab.             | 3680   |
| 88 | "uminescent measurement*".ti,kw,ab.                    | 0      |
| 89 | monocytes.ti,kw,ab.                                    | 1970   |
| 90 | neutrophils.ti,kw,ab.                                  | 3266   |
| 91 | radioimmunoassay.ti,kw,ab.                             | 2127   |
| 92 | respiratory burst.ti,kw,ab.                            | 145    |
| 93 | selectins.ti,kw,ab.                                    | 40     |
| 94 | (Th1 or Th2).ti,kw,ab.                                 | 1820   |
| 95 | (TNFalpha or TNF-alpha).ti,kw,ab.                      | 8003   |
| 96 | Tumor Necrosis Factor-alpha.ti,kw,ab.                  | 4203   |
| 97 | or/47-96 [**immunesystem]                              | 264067 |
| 98 | 17 and 46 and 97                                       | 334    |
| 99 | limit 98 to english language                           | 237    |



**eTable 1.** Evidence Table for Immune Markers

| 1 <sup>st</sup> Author, Year | Study design, Participants, Setting, Number (n) enrolled                                                                       | Interventions, Provider, Number (n) of subjects at baseline                                                                                                | Comparison, Provider, Number (n) of subjects at baseline                                                                                                                                                                                                       | Follow-up                                                                                                                   | Outcomes                                                                                         | Results                                                                                                                                                                                                                                                                                                                                                                                                                                                                                                                                                                                                                                                                                                                                                                                                                                                  | Quality of Evidence | Conclusion (notes) <sup>a</sup>              |
|------------------------------|--------------------------------------------------------------------------------------------------------------------------------|------------------------------------------------------------------------------------------------------------------------------------------------------------|----------------------------------------------------------------------------------------------------------------------------------------------------------------------------------------------------------------------------------------------------------------|-----------------------------------------------------------------------------------------------------------------------------|--------------------------------------------------------------------------------------------------|----------------------------------------------------------------------------------------------------------------------------------------------------------------------------------------------------------------------------------------------------------------------------------------------------------------------------------------------------------------------------------------------------------------------------------------------------------------------------------------------------------------------------------------------------------------------------------------------------------------------------------------------------------------------------------------------------------------------------------------------------------------------------------------------------------------------------------------------------------|---------------------|----------------------------------------------|
| Brennan 1994 <sup>1</sup>    | RCT; adult patients with LBP; duration >50 days; 45% female<br><br>Chiropractic teaching clinic in Lombard, USA<br><br>(n=201) | SMT: HVLA thrust to T12 to S1 (including SI joints), according to clinical indication by chiropractors in teaching clinic<br><br>11 tx/2 wks<br><br>(n=67) | 1. LFP sham tx: delivered to one level of the L/S<br><br>11 tx/2 wks by chiropractors in teaching clinic<br><br>(n=67)<br><br>2. Lecture series: educational lectures on LBP, no physical contact with physician and no exercise recommendations<br><br>(n=67) | i. At 12 <sup>th</sup> visit<br>ii. 2 wks post-tx<br><br>Loss to follow-up: 52/201=26% (unclear distribution across groups) | B lymphocytes<br>T lymphocytes<br>T <sub>H</sub> cells<br>T <sub>S</sub> cells<br>NK lymphocytes | <b>At 12<sup>th</sup> visit</b><br><br><b>1. SMT vs. LFP sham:</b><br>Mean difference at 12 <sup>th</sup> visit in % of lymphocyte:<br>Total T cells: 0.4 (-1.4, 2.2)<br>T <sub>H</sub> cells: 0.1 (-3.1, 3.4)<br>T <sub>S</sub> cells: 0.4 (-2.0, 2.8)<br>NK cells: -0.5 (-2.6, 1.6)<br>T <sub>S</sub> NK cells: -0.4 (-1.3, 0.5)<br>B cells: -1.5 (-3.4, 0.4)<br><br><b>2. SMT vs. lecture series:</b><br>Mean difference at 12 <sup>th</sup> visit in % of lymphocyte:<br>Total T cells: 0.5 (-1.6, 2.6)<br>T <sub>H</sub> cells: -2.4 (-5.4, 0.6)<br>T <sub>S</sub> cells: 1.9 (-0.4, 4.2)<br>NK cells: -0.8 (-3.1, 1.5)<br>T <sub>S</sub> NK cells: -0.2 (-1.2, 0.9)<br>B cells: -0.5 (-2.7, 1.7)<br><br><b>3. LFP sham vs. lecture series:</b><br>Mean difference at 12 <sup>th</sup> visit in % of lymphocyte:<br>Total T cells: -0.1 (-2.1, 1.9) | High (++)           | SMT is not associated with lymphocyte levels |

|  |  |  |  |  |                                                                                                                                                                                                                                                                                                                                                                                                                                                                                                                                                                                                                                                                                                                                                                                                                                                                                                                                                                                                                                                                                             |  |  |
|--|--|--|--|--|---------------------------------------------------------------------------------------------------------------------------------------------------------------------------------------------------------------------------------------------------------------------------------------------------------------------------------------------------------------------------------------------------------------------------------------------------------------------------------------------------------------------------------------------------------------------------------------------------------------------------------------------------------------------------------------------------------------------------------------------------------------------------------------------------------------------------------------------------------------------------------------------------------------------------------------------------------------------------------------------------------------------------------------------------------------------------------------------|--|--|
|  |  |  |  |  | <p>T<sub>H</sub> cells: 2.5 (-0.2, 5.2)<br/> T<sub>S</sub> cells: -1.5 (-3.6, 0.6)<br/> NK cells: 0.3 (-1.9, 2.5)<br/> T<sub>S</sub>NK cells: -0.2 (-1.1, 0.7)<br/> B cells: -1 (-3.2, 1.2)</p> <p><b><u>2 wks post-tx</u></b></p> <p><b>4. <u>SMT vs. LFP sham:</u></b><br/> Mean difference at 2 wks in % of lymphocyte:<br/> Total T cells: 1.2 (-0.6, 3.0)<br/> T<sub>H</sub> cells: -0.4 (-3.5, 2.7)<br/> T<sub>S</sub> cells: 0.2 (-2.2, 2.6)<br/> NK cells: 0.2 (-1.8, 2.2)<br/> T<sub>S</sub>NK cells: -0.1 (-1.0, 0.8)<br/> B cells: -1.1 (-2.9, 0.7)</p> <p><b>5. <u>SMT vs. lecture series:</u></b><br/> Mean difference at 2 wks in % of lymphocyte:<br/> Total T cells: 1.0 (-1.1, 3.1)<br/> T<sub>H</sub> cells: -2.9 (-5.6, -0.2)<br/> T<sub>S</sub> cells: 2.0 (-0.3, 4.3)<br/> NK cells: 0.1 (-1.9, 2.1)<br/> T<sub>S</sub>NK cells: 0 (-1.0, 1.0)<br/> B cells: -0.6 (-2.6, 1.4)</p> <p><b>6. <u>LFP sham vs. lecture series:</u></b><br/> Mean difference at 2 wks in % of lymphocyte:<br/> Total T cells: 0.2 (-1.9, 2.3)<br/> T<sub>H</sub> cells: 2.5 (-0.4, 5.4)</p> |  |  |
|--|--|--|--|--|---------------------------------------------------------------------------------------------------------------------------------------------------------------------------------------------------------------------------------------------------------------------------------------------------------------------------------------------------------------------------------------------------------------------------------------------------------------------------------------------------------------------------------------------------------------------------------------------------------------------------------------------------------------------------------------------------------------------------------------------------------------------------------------------------------------------------------------------------------------------------------------------------------------------------------------------------------------------------------------------------------------------------------------------------------------------------------------------|--|--|

|                           |                                                                                                                                                                                          |                                                                                                                                          |                                                                                                                                                                                                           |                                                                                                                                                                                                     |                                                                              |                                                                                                                                                                                                                                                                                                                                                                                                                                                                         |                |                                                                                                                          |
|---------------------------|------------------------------------------------------------------------------------------------------------------------------------------------------------------------------------------|------------------------------------------------------------------------------------------------------------------------------------------|-----------------------------------------------------------------------------------------------------------------------------------------------------------------------------------------------------------|-----------------------------------------------------------------------------------------------------------------------------------------------------------------------------------------------------|------------------------------------------------------------------------------|-------------------------------------------------------------------------------------------------------------------------------------------------------------------------------------------------------------------------------------------------------------------------------------------------------------------------------------------------------------------------------------------------------------------------------------------------------------------------|----------------|--------------------------------------------------------------------------------------------------------------------------|
|                           |                                                                                                                                                                                          |                                                                                                                                          |                                                                                                                                                                                                           |                                                                                                                                                                                                     |                                                                              | <p>T<sub>s</sub> cells: -1.8 (-4.1, 0.5)<br/> NK cells: 0.1 (-2.1, 2.3)<br/> T<sub>s</sub>NK cells: -0.1 (-1.0, 0.8)<br/> B cells: -0.5 (-2.6, 1.6)</p> <p>Each lymphocyte subpopulation (Total T cells, T<sub>H</sub> cells, T<sub>s</sub> cells, NK cells, T<sub>s</sub>NK cells, and B cells) were outcomes in repeated measures ANOVA with primary test of the treatment group by time interaction. None of the treatment by time interactions were significant</p> |                |                                                                                                                          |
| Brennan 1991 <sup>2</sup> | <p>RCT; healthy adult 1<sup>st</sup> year chiropractic students (naïve to SMT); mean age 26.2 (SD 5.5); 32% female</p> <p>Chiropractic teaching clinic in Lombard, USA</p> <p>(n=99)</p> | <p>SMT: HVLA thrust (posterior to anterior direction) from T1-T6</p> <p>One session by chiropractor in teaching clinic</p> <p>(n=42)</p> | <p>1. Sham: low-velocity light-force thrust (prone to anterior direction) to selected segment</p> <p>One session by chiropractor in teaching clinic</p> <p>(n=38)</p> <p>2. Soft tissue manipulation:</p> | <p>15 min post-tx</p> <p><u>Loss to follow-up/missing data:</u></p> <p><u>PMN:</u><br/> SMT: 9.5%<br/> Sham: 7.9%<br/> Soft tissue: 21%</p> <p><u>Substance P:</u><br/> SMT: 25%<br/> Sham: 36%</p> | <p>CL response of PMN</p> <p>CL response of monocytes</p> <p>Substance P</p> | <p><b><u>CL response of PMN</u></b></p> <p>Pre-post difference in mean peak/sec/cell<sup>b</sup>:<br/> SMT (n=38): 2.9<br/> Sham (n=35): 0.2<br/> Soft tissue (n=15): -0.03</p> <p><b><u>CL response of monocytes</u></b></p> <p>Pre-post difference in mean peak/sec/cell<sup>c</sup>:<br/> SMT (n=38): 0.71<br/> Sham (n=42): 0.09<br/> Soft tissue (n=19): 0.07</p> <p><b><u>Substance P</u></b></p>                                                                 | Acceptable (+) | <p>SMT is associated with changes in CL response to PMN and monocytes</p> <p>(clinical meaning of effect is unknown)</p> |

|                                      |                                                                                                                           |                                                                                                                                                                    |                                                                                                                                                                                                                                                    |                                                                    |                                                               |                                                                                                                                                                                                                                                                                                                                                                                                                                                                          |                |                                                                                                                                                                    |
|--------------------------------------|---------------------------------------------------------------------------------------------------------------------------|--------------------------------------------------------------------------------------------------------------------------------------------------------------------|----------------------------------------------------------------------------------------------------------------------------------------------------------------------------------------------------------------------------------------------------|--------------------------------------------------------------------|---------------------------------------------------------------|--------------------------------------------------------------------------------------------------------------------------------------------------------------------------------------------------------------------------------------------------------------------------------------------------------------------------------------------------------------------------------------------------------------------------------------------------------------------------|----------------|--------------------------------------------------------------------------------------------------------------------------------------------------------------------|
|                                      |                                                                                                                           |                                                                                                                                                                    | to either right or left gluteal area<br><br>One session by chiropractor in teaching clinic<br><br>(n=19)                                                                                                                                           |                                                                    |                                                               | Mean difference of change in pg/mL: 11.1. This difference is not significantly different from zero (p-value not reported)<br><br>No data for SP were collected for soft tissue group                                                                                                                                                                                                                                                                                     |                | SMT is not associated with substance P levels                                                                                                                      |
| Teodorczyk-Injeyan 2006 <sup>3</sup> | RCT; healthy adult chiropractic students; 56% female<br><br>Chiropractic teaching clinic in Toronto, Canada<br><br>(n=64) | SMT: HVLA thrust (Carver-Bridge) with cavitation in anterior and superior direction to the T/S<br><br>One session by chiropractor in teaching clinic<br><br>(n=24) | 1. Sham: HVLA thrust (Carver-Bridge) without cavitation (positioning and line of drive that did not cavitate joint)<br><br>One session by chiropractor in teaching clinic<br><br>(n=20)<br><br>2. Venipuncture control (VC)<br>No tx<br><br>(n=20) | i. 20 min post-tx<br>ii. 2 hrs post-tx<br><br>No loss to follow-up | TNF- $\alpha^d$<br>IL-1 $\beta^d$<br>Substance P <sup>d</sup> | <b>20 min post-tx</b><br><br><b>SMT vs. Sham:</b><br>Mean difference in amount of change from baseline (pg/mL):<br><br>TNF- $\alpha$ : 471 (-29.5, 971.5)<br><br>IL-1 $\beta$ : 223 (-205.8, 651.8)<br><br><b>SMT vs. VC:</b><br>Mean difference in amount of change from baseline (pg/mL):<br><br>TNF- $\alpha$ : 358 (-74.1, 790.1)<br><br>IL-1 $\beta$ : 156 (-256.4, 568.4)<br><br><b>Sham vs. VC:</b><br>Mean difference in amount of change from baseline (pg/mL): | Acceptable (+) | SMT associated with attenuation of TNF- $\alpha$ and IL-1 $\beta$ production levels at 2 hrs, but not at 20 minutes<br><br>(clinical meaning of effect is unknown) |

|  |  |  |  |  |  |                                                                                                                                                                                                                                                                                                                                                                                                                                                                                                                                                                                                                                                                                                                                                                 |  |  |
|--|--|--|--|--|--|-----------------------------------------------------------------------------------------------------------------------------------------------------------------------------------------------------------------------------------------------------------------------------------------------------------------------------------------------------------------------------------------------------------------------------------------------------------------------------------------------------------------------------------------------------------------------------------------------------------------------------------------------------------------------------------------------------------------------------------------------------------------|--|--|
|  |  |  |  |  |  | <p>TNF-<math>\alpha</math>: 113 (-405.8, 631.8)</p> <p>IL-1<math>\beta</math>: 67 (-352.1, 486.1)</p> <p><b><u>2 hrs post-tx</u></b></p> <p><b><u>SMT vs. Sham:</u></b><br/>Mean difference in amount of change from baseline (pg/mL):</p> <p>TNF-<math>\alpha</math>: 1091 (497.0, 1685.0)</p> <p>IL-1<math>\beta</math>: -612 (97.3, 1126.7)</p> <p><b><u>SMT vs. VC:</u></b><br/>Mean difference in amount of change from baseline (pg/mL):</p> <p>TNF-<math>\alpha</math>: 800 (249.3, 1350.7)</p> <p>IL-1<math>\beta</math>: 565 (96.3, 1033.7)</p> <p><b><u>Sham vs. VC:</u></b><br/>Mean difference in amount of change from baseline (pg/mL):</p> <p>TNF-<math>\alpha</math>: 291 (-314.9, 896.9)</p> <p>IL-1<math>\beta</math>: 67 (-352.1, 486.1)</p> |  |  |
|--|--|--|--|--|--|-----------------------------------------------------------------------------------------------------------------------------------------------------------------------------------------------------------------------------------------------------------------------------------------------------------------------------------------------------------------------------------------------------------------------------------------------------------------------------------------------------------------------------------------------------------------------------------------------------------------------------------------------------------------------------------------------------------------------------------------------------------------|--|--|

|                                      |                                                                                                                    |                                                                                                |                                                                                                                     |                                                                                                                    |                                                      |                                                                                                                                                                                                                                            |                |                                                                                         |
|--------------------------------------|--------------------------------------------------------------------------------------------------------------------|------------------------------------------------------------------------------------------------|---------------------------------------------------------------------------------------------------------------------|--------------------------------------------------------------------------------------------------------------------|------------------------------------------------------|--------------------------------------------------------------------------------------------------------------------------------------------------------------------------------------------------------------------------------------------|----------------|-----------------------------------------------------------------------------------------|
|                                      |                                                                                                                    |                                                                                                |                                                                                                                     |                                                                                                                    |                                                      | <p>Substance P findings reported in bar charts: no statistically significant differences between groups at follow-up.</p> <p>Baseline mean values of substance P were 55, 51 and 54 pg/mL for the VC, sham and SMT groups respectively</p> |                |                                                                                         |
|                                      |                                                                                                                    |                                                                                                |                                                                                                                     |                                                                                                                    |                                                      |                                                                                                                                                                                                                                            |                | SMT-C is not associated with substance P levels                                         |
| Teodorczyk-Injeyan 2008 <sup>4</sup> | <p>RCT; healthy adult chiropractic students; 56% female</p> <p>Chiropractic teaching clinic in Toronto, Canada</p> | SMT: HVLA thrust (Carver-Bridge) with cavitation in anterior and superior direction to the T/S | 1. Sham: HVLA thrust (Carver-Bridge) without cavitation (positioning and line of drive that did not cavitate joint) | <p>1. 20 min post-tx</p> <p>ii. 2 hrs post-tx</p> <p>Loss to follow-up:<br/>SMT: 3.3%<br/>Sham: 8%<br/>VC: 11%</p> | IL-2 induced by SPA <sup>e</sup> or TPA <sup>e</sup> | <p><b><u>20 min post-tx</u></b></p> <p><u>IL-2 production induced by SPA<sup>e</sup>:</u></p> <p><b><u>SMT vs. Sham:</u></b><br/>No significant difference (p=0.436)</p> <p><b><u>SMT vs. VC:</u></b></p>                                  | Acceptable (+) | SMT and sham associated with increase in IL-2 levels at 20 min and 2 hrs compared to VC |

|  |        |                                                              |                                                                                                                     |  |  |                                                                                                                                                                                                                                                                                                                                                                                                                                                                                                                                                                                                                                                                                                                       |                                                                                          |
|--|--------|--------------------------------------------------------------|---------------------------------------------------------------------------------------------------------------------|--|--|-----------------------------------------------------------------------------------------------------------------------------------------------------------------------------------------------------------------------------------------------------------------------------------------------------------------------------------------------------------------------------------------------------------------------------------------------------------------------------------------------------------------------------------------------------------------------------------------------------------------------------------------------------------------------------------------------------------------------|------------------------------------------------------------------------------------------|
|  | (n=82) | One session by chiropractor in teaching clinic<br><br>(n=30) | One session by chiropractor in teaching clinic<br>(n=25)<br><br>2. Venipuncture control (VC)<br>No tx<br><br>(n=27) |  |  | <p>Significant difference (p=0.000)</p> <p><b><u>Sham vs. VC:</u></b><br/>Significant difference (p=0.006)</p> <p><u>IL-2 production induced by TPA+ calcium ionophore<sup>e</sup>:</u></p> <p>No significant difference between groups (p=0.085)</p> <p><b><u>2 hrs post-tx</u></b></p> <p><u>IL-2 production induced by SPA<sup>e</sup>:</u></p> <p><b><u>SMT vs. Sham:</u></b><br/>No significant difference (p=0.737)</p> <p><b><u>SMT vs. VC:</u></b><br/>Significant difference (p=0.001)</p> <p><b><u>Sham vs. VC:</u></b><br/>Significant difference (p=0.003)</p> <p><u>IL-2 production induced by TPA+ calcium ionophore<sup>e</sup>:</u></p> <p>No significant difference between all groups (p=0.802)</p> | <p>(clinical meaning of effect is unknown)</p> <p>No difference between SMT and sham</p> |
|--|--------|--------------------------------------------------------------|---------------------------------------------------------------------------------------------------------------------|--|--|-----------------------------------------------------------------------------------------------------------------------------------------------------------------------------------------------------------------------------------------------------------------------------------------------------------------------------------------------------------------------------------------------------------------------------------------------------------------------------------------------------------------------------------------------------------------------------------------------------------------------------------------------------------------------------------------------------------------------|------------------------------------------------------------------------------------------|

|                                            |                                                                                                                                  |                                                                                                                                                                           |                                                                                                                                                                                                                                                        |                                                                                                 |                                                                      |                                                                                                                                                                                                                                                                                                                                                                                                                                                                                                                                                                                                                                                                                                                                                                                                                      |                       |                                                                                                                                       |
|--------------------------------------------|----------------------------------------------------------------------------------------------------------------------------------|---------------------------------------------------------------------------------------------------------------------------------------------------------------------------|--------------------------------------------------------------------------------------------------------------------------------------------------------------------------------------------------------------------------------------------------------|-------------------------------------------------------------------------------------------------|----------------------------------------------------------------------|----------------------------------------------------------------------------------------------------------------------------------------------------------------------------------------------------------------------------------------------------------------------------------------------------------------------------------------------------------------------------------------------------------------------------------------------------------------------------------------------------------------------------------------------------------------------------------------------------------------------------------------------------------------------------------------------------------------------------------------------------------------------------------------------------------------------|-----------------------|---------------------------------------------------------------------------------------------------------------------------------------|
| <p>Teodorczyk-Injeyan 2010<sup>5</sup></p> | <p>RCT; healthy adult chiropractic students; 56% female</p> <p>Chiropractic teaching clinic in Toronto, Canada</p> <p>(n=82)</p> | <p>SMT: HVLA thrust (Carver-Bridge) with cavitation in anterior and superior direction to the T/S</p> <p>One session by chiropractor in teaching clinic</p> <p>(n=30)</p> | <p>1. Sham: HVLA thrust (Carver-Bridge) without cavitation (positioning and line of drive that did not cavitate joint)</p> <p>One session by chiropractor in teaching clinic</p> <p>(n=25)</p> <p>2. Venipuncture control (VC) No tx</p> <p>(n=27)</p> | <p>i. 20 min post-txii. 2 hrs post-tx</p> <p>Loss to follow-up: SMT: 10% Sham: 0% VC: 18.5%</p> | <p>IgG<br/>IgM<br/>B (CD19) lymphocytes<br/>T (CD 3) lymphocytes</p> | <p><b><u>PWM-induced antibody production</u></b><br/>The mean production of both IgG and IgM in cultures from VC, sham and SMT subjects were unchanged</p> <p><b><u>IL-2-induced antibody production</u></b></p> <p><b><u>IgG</u></b><br/>Repeated measures ANOVA of the transformed data demonstrated a statistically significant group by time interaction effect (F=2.8, p=0.03). At 20 min post-treatment, the mean production of IgG in the SMT group was significantly higher than that in the VC and sham groups.<sup>d</sup> At 2 hr post-treatment, the production of IgG in cultures from both SMT and sham was significantly elevated compared to VC.<sup>d</sup></p> <p><b><u>IgM</u></b><br/>Repeated measures ANOVA of the transformed data demonstrated a statistically significant group by time</p> | <p>Acceptable (+)</p> | <p>SMT associated with IL-2-induced augmentation of IgG and IgM levels<sup>f</sup></p> <p>(clinical meaning of effect is unknown)</p> |
|--------------------------------------------|----------------------------------------------------------------------------------------------------------------------------------|---------------------------------------------------------------------------------------------------------------------------------------------------------------------------|--------------------------------------------------------------------------------------------------------------------------------------------------------------------------------------------------------------------------------------------------------|-------------------------------------------------------------------------------------------------|----------------------------------------------------------------------|----------------------------------------------------------------------------------------------------------------------------------------------------------------------------------------------------------------------------------------------------------------------------------------------------------------------------------------------------------------------------------------------------------------------------------------------------------------------------------------------------------------------------------------------------------------------------------------------------------------------------------------------------------------------------------------------------------------------------------------------------------------------------------------------------------------------|-----------------------|---------------------------------------------------------------------------------------------------------------------------------------|



|  |  |  |  |  |                                                                                                                                                                                                                                                                                                                                                                                                                                                                                                                                                                                                                                                                                                                     |                                                             |
|--|--|--|--|--|---------------------------------------------------------------------------------------------------------------------------------------------------------------------------------------------------------------------------------------------------------------------------------------------------------------------------------------------------------------------------------------------------------------------------------------------------------------------------------------------------------------------------------------------------------------------------------------------------------------------------------------------------------------------------------------------------------------------|-------------------------------------------------------------|
|  |  |  |  |  | <p>interaction effect (F=2.7, p=0.04). At 2 hr posttreatment the mean level of IgM synthesis in the SMT group was significantly elevated compared with the VC group.<sup>e</sup></p> <p><b><u>Phenotypic analysis</u></b></p> <p><b><u>SMT vs. Sham:</u></b><br/>Mean difference in change from baseline (%)<sup>e</sup></p> <p>B (CD19) lymphocytes: 0.6<br/>T (CD3) lymphocytes: -6.0</p> <p><b><u>SMT vs. VC:</u></b><br/>Mean difference in change from baseline (%)<sup>e</sup></p> <p>B (CD19) lymphocytes: 1.0<br/>T (CD3) lymphocytes: -4.0</p> <p><b><u>Sham vs. VC:</u></b><br/>Mean difference in change from baseline (%)<sup>e</sup></p> <p>B (CD19) lymphocytes: 0.4<br/>T (CD3) lymphocytes: 2.0</p> | <p>SMT is not associated with B and T lymphocyte levels</p> |
|--|--|--|--|--|---------------------------------------------------------------------------------------------------------------------------------------------------------------------------------------------------------------------------------------------------------------------------------------------------------------------------------------------------------------------------------------------------------------------------------------------------------------------------------------------------------------------------------------------------------------------------------------------------------------------------------------------------------------------------------------------------------------------|-------------------------------------------------------------|

Abbreviations: CL chemiluminescence, cpm counts per minute, CRP C-reactive protein, C/S cervical spine, HIV human immunodeficiency virus, hrs hours, HVLA high velocity low amplitude, IgG immunoglobulin G, IgM immunoglobulin M, IL interleukin, LBP low back pain, LFP low force, high velocity low amplitude procedure, LPS lipopolysaccharide, L/S lumbar spine, min minutes, MT manual treatment, MVMA moderate velocity moderate amplitude, NK natural killer cells, ODI Oswestry Disability Index, OMT osteopathic manipulative treatment, PHA phytohaemagglutinin, PMN Polymorphonuclear neutrophils, PWM pokeweed mitogen, RCT randomized controlled trial, SI sacroiliac joint, SMT spinal manipulative therapy, SMT spinal manipulative therapy with cavitation, US ultrasound, T<sub>H</sub> T-helper cells, TNF- $\alpha$  tumor necrosis factor  $\alpha$ , T<sub>S</sub> T-suppressor cells, T/S thoracic spine, Tx treatment, UK United Kingdom, USA United States of America, VAS visual analogue scale, w/o without, w/ with, wks weeks, yo years old

<sup>a</sup>Red: no effect of SMT; green: effect of SMT; yellow: results depend on processing of cells.

<sup>b</sup>Derived from regression models in Table 1, using a pre value of 3.0. Note that intercepts in the model are not significantly different, but the slope for SMT is significantly higher ( $p < .005$ ) than the slope for either sham or soft tissue.

<sup>c</sup>Derived from regression models in Table 2, using a pre value of 1.75. Note that intercepts in the model are not significantly different, but the slope for SMT is significantly higher ( $p < .005$ ) than the slope for either sham or soft tissue.

<sup>d</sup>SI conversion factors: To convert TNF- $\alpha$  from pg/mL to nM/L, multiply values by  $5.85 \times 10^{-5}$ . To convert IL-1 $\beta$  from pg/mL to nM/L, multiply values by  $5.85 \times 10^{-5}$ . To convert substance P from pg/mL to pmol/L, multiply values by 0.742.

<sup>e</sup>Unable to calculate mean difference (95% CI) due to lack of data reported.

<sup>f</sup>While a point estimate of the magnitude of the effect can be determined, a confidence interval cannot with the data as reported.

**eTable 2.** Evidence Table for Endocrine and Other Physiological Markers

| 1 <sup>st</sup> Author, Year | Study design, Participants, Setting, Number (n) enrolled                                                                               | Interventions, Provider, Number (n) of subjects at baseline                                                                                              | Comparison, Provider, Number (n) of subjects at baseline                                                                                                      | Follow-up                                                                                       | Outcome Measures                                        | Results                                                                                                                                                                                           | Quality of Evidence | Conclusion (notes) <sup>a</sup>                                  |
|------------------------------|----------------------------------------------------------------------------------------------------------------------------------------|----------------------------------------------------------------------------------------------------------------------------------------------------------|---------------------------------------------------------------------------------------------------------------------------------------------------------------|-------------------------------------------------------------------------------------------------|---------------------------------------------------------|---------------------------------------------------------------------------------------------------------------------------------------------------------------------------------------------------|---------------------|------------------------------------------------------------------|
| Mackawan 2007 <sup>6</sup>   | RCT; patients with chronic LBP (>12 wks), 20-60 yo, 61% female<br><br>Physical therapy department in Khon Kaen, Thailand<br><br>(n=67) | TTM<br>Deep massage with prolonged pressure (10 min) on the muscles along with passive stretching<br><br>One session by physical therapist<br><br>(n=35) | Joint mobilization<br>Grade 2 mobilization, 5 min/set, 2 sets/level at lumbar spinous process of L2–L5<br><br>One session by physical therapist<br><br>(n=32) | 5 min post-tx<br><br>No loss to follow-up                                                       | Substance P <sup>b</sup>                                | Mean difference (95% CI) in change from pre- to post-tx (pg/mL): 1.2 (-21.6, 24.1)                                                                                                                | Acceptable (+)      | SMT is not associated with substance P levels                    |
| Puhl 2012 <sup>7</sup>       | RCT; healthy adults, 20-45 yo, 47% female<br><br>Chiropractic teaching clinic in Toronto, Canada                                       | SMT: HVLA thrust, either 1) combination type adjustment (hypothernar transverse push) for segments T1 to T3,                                             | Sham: HVLA thrust, either combination or Carver-Bridge without cavitation                                                                                     | i. immediately post-tx<br>ii. 15 min post-tx<br><br>Loss to follow-up: SMT: 5.3%<br>Sham: 14.3% | Norepinephrine <sup>b</sup><br>Epinephrine <sup>b</sup> | <b>Immediately post-tx</b><br><br><b>SMT vs. Sham:</b><br>Mean difference in amount of change from baseline (nM):<br><br>Norepinephrine: -0.06 (-0.26, 0.38) <sup>c</sup><br>Epinephrine: 0.05 (- | Acceptable (+)      | SMT is not associated with norepinephrine and epinephrine levels |

|                           |                                                                                                                                          |                                                                                                                                                           |                                                                                                                                                                   |                                                                                          |                                                                                                                                             |                                                                                                                                                                                                                                                                                                                                                                                    |                |                                                                                                                                                                                                                 |
|---------------------------|------------------------------------------------------------------------------------------------------------------------------------------|-----------------------------------------------------------------------------------------------------------------------------------------------------------|-------------------------------------------------------------------------------------------------------------------------------------------------------------------|------------------------------------------------------------------------------------------|---------------------------------------------------------------------------------------------------------------------------------------------|------------------------------------------------------------------------------------------------------------------------------------------------------------------------------------------------------------------------------------------------------------------------------------------------------------------------------------------------------------------------------------|----------------|-----------------------------------------------------------------------------------------------------------------------------------------------------------------------------------------------------------------|
|                           | (n=56)                                                                                                                                   | or 2) Carver-Bridge type adjustment (bilateral hypothenar push) for segments T4 to T6<br><br>One session by chiropractor in teaching clinic<br><br>(n=26) | One session by chiropractor in teaching clinic<br><br>(n=30)                                                                                                      |                                                                                          |                                                                                                                                             | 0.39, 0.29 <sup>c</sup><br><br><b>15 min post-tx</b><br><br><b>SMT vs. Sham:</b><br>Mean difference in amount of change from baseline (nM):<br><br>Norepinephrine: 0.01 (-0.07, 0.05) <sup>c</sup><br>Epinephrine: 0.01 (-0.07, 0.05) <sup>c</sup>                                                                                                                                 |                |                                                                                                                                                                                                                 |
| Sampath 2017 <sup>8</sup> | RCT; healthy men, 18-45 yo<br><br>Recruited through advertising<br><br>Physical therapy department in Dunedin, New Zealand<br><br>(n=24) | SMT HVLA thrust to T/S through the participant's upper extremity and thorax upon expiration<br><br>One session by physical therapist<br><br>(n=12)        | Sham tx identical to SMT but therapist did not place a fixating hand against the thoracic spine, no thrust<br><br>One session by physical therapist<br><br>(n=12) | i. 5 min post-tx<br>ii. 30 min post-tx<br>iii. 6 hrs post-tx<br><br>No loss to follow-up | Salivary cortisol <sup>b</sup><br>Testosterone <sup>b</sup><br>T/C ratio <sup>b</sup><br>O <sub>2</sub> Hb <sup>b</sup><br>HRV <sup>b</sup> | <b>5 min post-tx</b><br><br><u>Mean difference (95% CI) in (pg/m)</u><br><br>Cortisol: -0.4 (-0.6, -0.12) <sup>d</sup><br>Testosterone: 10.1 (-43.5, 63.8)<br>T/C ratio: 0.04 (-0.05, 0.13)<br>O <sub>2</sub> Hb: 0.89 (13.9, 15.6)<br>HRV: -0.11 (-0.47, 0.25)<br><br><b>30 min post-tx</b><br><br><u>Mean difference (95% CI) in (pg/m)</u><br><br>Cortisol: -0.20 (-0.46, 0.05) | Acceptable (+) | SMT associated with changes in cortisol levels at 5 minutes only<br><br>(clinical meaning of effect is unknown)<br><br>SMT is not associated with levels of testosterone, T/C ratio, O <sub>2</sub> Hb, and HRV |

|  |  |  |  |  |                                                                                                                                                                                                                                                                                                                                                                                                                 |  |  |
|--|--|--|--|--|-----------------------------------------------------------------------------------------------------------------------------------------------------------------------------------------------------------------------------------------------------------------------------------------------------------------------------------------------------------------------------------------------------------------|--|--|
|  |  |  |  |  | <p>Testosterone: -6.29 (-60, 47.5)<br/> T/C ratio: 0.00 (-0.09, 0.09)<br/> O<sub>2</sub>Hb: 15.2 (-30.5, 60.9)<br/> HRV: 0.01 (-0.47, 0.25)</p> <p><b>6 hrs post-tx</b></p> <p><u>Mean difference (95% CI) in (pg/m)</u></p> <p>Cortisol: 0.23 (-0.06, 0.53)<br/> Testosterone: -12.9 (-47.5, 21.8)<br/> T/C ratio: -0.09 (-0.16, -0.04)</p> <p>O<sup>2</sup>Hb and HRV data not reported for 6 hrs post-tx</p> |  |  |
|--|--|--|--|--|-----------------------------------------------------------------------------------------------------------------------------------------------------------------------------------------------------------------------------------------------------------------------------------------------------------------------------------------------------------------------------------------------------------------|--|--|

Abbreviations: C/S cervical spine, HRV heart rate variability, HVLA high velocity low amplitude, LBP low back pain, min minutes, NO nitric oxide, O<sub>2</sub>Hb oxyhemoglobin, RCT randomized controlled trial, SD standard deviation, SMT spinal manipulative therapy, T/C ratio testosterone/cortisol ratio, T/S thoracic spine, TTM traditional Thai massage, Tx treatment, USA United States of America, w/o without, w/ with, wks weeks, yo years old

<sup>a</sup>Red: no effect of SMT; green: effect of SMT; yellow: results depend on processing of cells.

<sup>b</sup>SI conversion factors: To convert substance P from pg/mL to pmol/L, multiply values by 0.742. To convert norepinephrine from pg/mL to pmol/L, multiply values by 5.911. To convert epinephrine from pg/mL to pmol/L, multiply values by 5.459. To convert cortisol from µg/dL to nmol/L, multiply values by 27.588. To convert testosterone from ng/dL to nmol/L, multiply values by 0.0347.

<sup>c</sup>We report difference in mean change scores and 95% CI using the reported mean change scores and standard errors from Table 2 and 3. Note that in two instances in Table 2, the reported mean change scores cannot be reproduced taking differences in means. There is clearly an error in reporting, but we are unable to identify which values are in error.

<sup>d</sup>The reported results cannot be used because they are statistically incorrect. The reported p value was 0.005. There was likely a typo in the reporting of results; therefore, we imputed the 95% CI.

## eReferences

1. Brennan PC, Graham MA, Triano JJ, Hondras MA, Anderson RJ. Lymphocyte profiles in patients with chronic low back pain enrolled in a clinical trial. *J Manipulative Physiol Ther.* 1994;17(4):219-227.
2. Brennan PC, Kokjohn K, Kaltinger CJ, et al. Enhanced phagocytic cell respiratory burst induced by spinal manipulation: potential role of substance P. *J Manipulative Physiol Ther.* 1991;14(7):399-408.
3. Teodorczyk-Injeyan JA, Injeyan HS, Ruegg R. Spinal manipulative therapy reduces inflammatory cytokines but not substance P production in normal subjects. *J Manipulative Physiol Ther.* 2006;29(1):14-21.
4. Teodorczyk-Injeyan JA, Injeyan HS, McGregor M, Harris GM, Ruegg R. Enhancement of in vitro interleukin-2 production in normal subjects following a single spinal manipulative treatment. *Chiropr Osteopat.* 2008;16:5.
5. Teodorczyk-Injeyan JA, McGregor M, Ruegg R, Injeyan HS. Interleukin 2-regulated in vitro antibody production following a single spinal manipulative treatment in normal subjects. *Chiropr Osteopat.* 2010;18:26.
6. Mackawan S, Eungpinichpong W, Pantumethakul R, Chatchawan U, Hunsawong T, Arayawichanon P. Effects of traditional Thai massage versus joint mobilization on substance P and pain perception in patients with non-specific low back pain. *Journal of Bodywork and Movement Therapies.* 2007;11(1):9-16.
7. Puhl AA, Injeyan HS. Short-term effects of manipulation to the upper thoracic spine of asymptomatic subjects on plasma concentrations of epinephrine and norepinephrine—a randomized and controlled observational study. *J Manipulative Physiol Ther.* 2012;35(3):209-215.
8. Sampath KK, Botnmark E, Mani R, et al. Neuroendocrine response following a thoracic spinal manipulation in healthy men. *J Orthop Sports Phys Ther.* 2017;47(9):617-627.
9. Tricco AC, Antony J, Zarin W, et al. A scoping review of rapid review methods. *BMC Med.* 2015;13:224.
10. Tricco AC, Langlois E, Straus S. *Rapid Reviews to Strengthen Health Policy and Systems: A Practice Guide.* Geneva: World Health Organization; 2017.
11. Varker T, Forbes D, Dell L, et al. Rapid evidence assessment: increasing the transparency of an emerging methodology. *J Eval Clin Pract.* 2015;21(6):1199-1204.
12. Featherstone RM, Dryden DM, Foisy M, et al. Advancing knowledge of rapid reviews: An analysis of results, conclusions and recommendations from published review articles examining rapid reviews. *Syst Rev.* 2015;4:50.
13. Corso M, Cancelliere C, Mior S, Kumar V, Smith A, Côté P. The clinical utility of routine spinal radiographs by chiropractors: a rapid review of the literature. *Chiropr Man Therap.* 2020;28(1):33.
14. Corso M, Cancelliere C, Mior S, Taylor-Vaisey A, Côté P. The safety of spinal manipulative therapy in children under 10 years: a rapid review. *Chiropr Man Therap.* 2020;28(1):12.
15. Moher D, Liberati A, Tetzlaff J, Altman DG, The Prisma Group. Preferred Reporting Items for Systematic Reviews and Meta-Analyses: The PRISMA Statement. *PLOS Medicine.* 2009;6(7):e1000097.
16. Rubinstein SM, Terwee CB, Assendelft WJ, de Boer MR, van Tulder MW. Spinal manipulative therapy for acute low-back pain. *Cochrane Database Syst Rev.* 2012;2012(9):Cd008880.
17. Maitland G, Hengeveld E, Banks K, English K. *Maitland's Vertebral Manipulation.* 7th ed. Toronto: Elsevier Butterworth Heinemann; 2005.
18. Dagenais S, Haldeman S. *Evidence-based management of low back pain.* Amsterdam, Netherlands: Elsevier; 2012.

19. Biomarkers Definition Working Group. Biomarkers and surrogate endpoints: Preferred definitions and conceptual framework. *Clin Pharmacol Ther.* 2001;69(3):89-95.
20. Scottish Intercollegiate Guidelines Network. Methodology: Checklists. <https://www.sign.ac.uk/what-we-do/methodology/checklists/>. Published 2013. Accessed August 23, 2020.
21. Campbell CM, Gilron I, Doshi T, Raja S. Designing and conducting proof-of-concept chronic pain analgesic clinical trials. *Pain Rep.* 2019;4(3):e697.
22. Campbell M, McKenzie JE, Sowden A, et al. Synthesis without meta-analysis (SWiM) in systematic reviews: reporting guideline. *BMJ.* 2020;368:l6890.
23. Hewitt CE, Kumaravel B, Dumville JC, Torgerson DJ. Assessing the impact of attrition in randomized controlled trials. *J Clin Epidemiol.* 2010;63(11):1264-1270.
24. Kjaergard LL, Villumsen J, Gluud C. Reported methodologic quality and discrepancies between large and small randomized trials in meta-analyses. *Ann Intern Med.* 2001;135(11):982-989.
25. Pildal J, Hróbjartsson A, Jørgensen KJ, Hilden J, Altman DG, Gøtzsche PC. Impact of allocation concealment on conclusions drawn from meta-analyses of randomized trials. *Int J Epidemiol.* 2007;36(4):847-857.
26. Trowman R, Dumville JC, Torgerson DJ, Cranny G. The impact of trial baseline imbalances should be considered in systematic reviews: A methodological case study. *J Clin Epidemiol.* 2007;60(12):1229-1233.
27. Wood L, Egger M, Gluud LL, et al. Empirical evidence of bias in treatment effect estimates in controlled trials with different interventions and outcomes: Meta-epidemiological study. *Bmj.* 2008;336(7644):601-605.
